# Supplementary material for: Multi-stimuli responsive fluorescent behaviors of a donor–π–acceptor phenothiazine modified benzothiazole derivative
Source: Royal Society of Chemistry journal article supplement (doi:10.1039/c6ra19791d), 2016-01-01
Supplement: c6ra19791d1.pdf [file c6ra19791d1.pdf]

## Electronic Supplementary Information (ESI)

### **Multi-stimuli responsive fluorescent behaviors of donor- $\pi$ -acceptor phenothiazine modified benzothiazole derivative**

Yong Zhan,<sup>\*a</sup> Jinyu Zhao,<sup>b</sup> Peng Yang,<sup>a</sup> Wenjing Ye.<sup>a</sup>

<sup>a</sup> *Key Laboratory of Structure-Based Drug Design and Discovery of Ministry of Education, Shenyang Pharmaceutical University, Shenyang, 110016, P. R. China*

<sup>b</sup> *State Key Laboratory of Supramolecular Structure and Materials, College of Chemistry, Jilin University, Changchun, 130012, P. R. China.*

E-mail: [zhanyong2046@126.com](mailto:zhanyong2046@126.com).

Tel: +86-024-23986449

**Table S1.** Photophysical data of **PVBT**.

| solvent                  | $\lambda_{\text{abs}}$ (nm) ( $\epsilon$ ) <sup>a</sup> | $\lambda_{\text{em}}$ (nm) | Stokes shift ( $\text{cm}^{-1}$ ) | $\Phi_F$ <sup>b</sup> |
|--------------------------|---------------------------------------------------------|----------------------------|-----------------------------------|-----------------------|
| n-hexane                 | 330 (0.84)                                              | 483, 511                   | 9599                              | 0.56                  |
|                          | 387 (0.60)                                              |                            |                                   |                       |
| cyclohexane              | 331 (2.68)                                              | 486, 515                   | 9635                              | 0.76                  |
|                          | 390 (1.90)                                              |                            |                                   |                       |
| toluene                  | 340 (3.11)                                              | 524                        | 10327                             | 0.45                  |
|                          | 401 (2.86)                                              |                            |                                   |                       |
| $\text{CHCl}_3$          | 340 (3.19)                                              | 554                        | 11361                             | 0.36                  |
|                          | 401 (2.96)                                              |                            |                                   |                       |
| THF                      | 342 (3.57)                                              | 559                        | 11350                             | 0.23                  |
|                          | 401 (3.45)                                              |                            |                                   |                       |
| $\text{CH}_2\text{Cl}_2$ | 341 (3.46)                                              | 563                        | 11564                             | 0.18                  |
|                          | 402 (3.29)                                              |                            |                                   |                       |
| DMF                      | 343 (3.41)                                              | 580                        | 11913                             | 0.02                  |
|                          | 404 (3.49)                                              |                            |                                   |                       |

<sup>a</sup>  $\times 10^4 \text{ M}^{-1} \text{ cm}^{-1}$ ; <sup>b</sup> The fluorescence quantum yield ( $\Phi_F$ ) of **PVBT** was measured using 9,10-diphenylanthracene in benzene ( $\Phi_F = 0.85$ ) as standard.

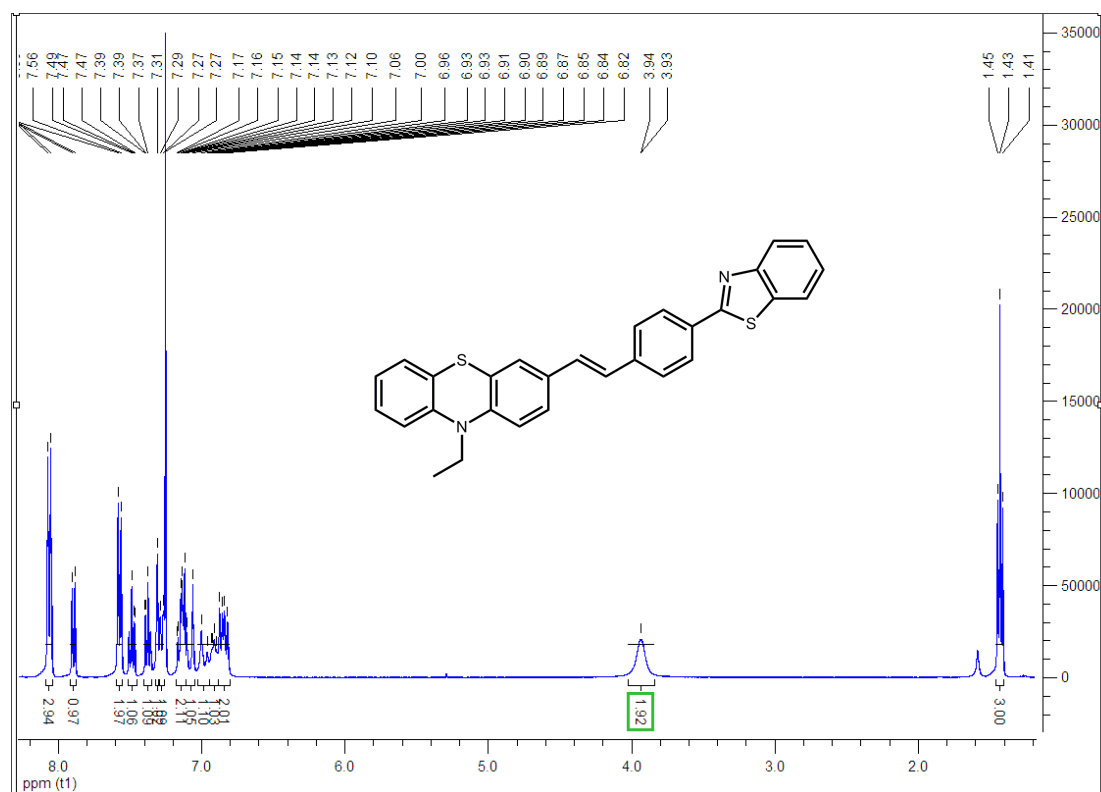

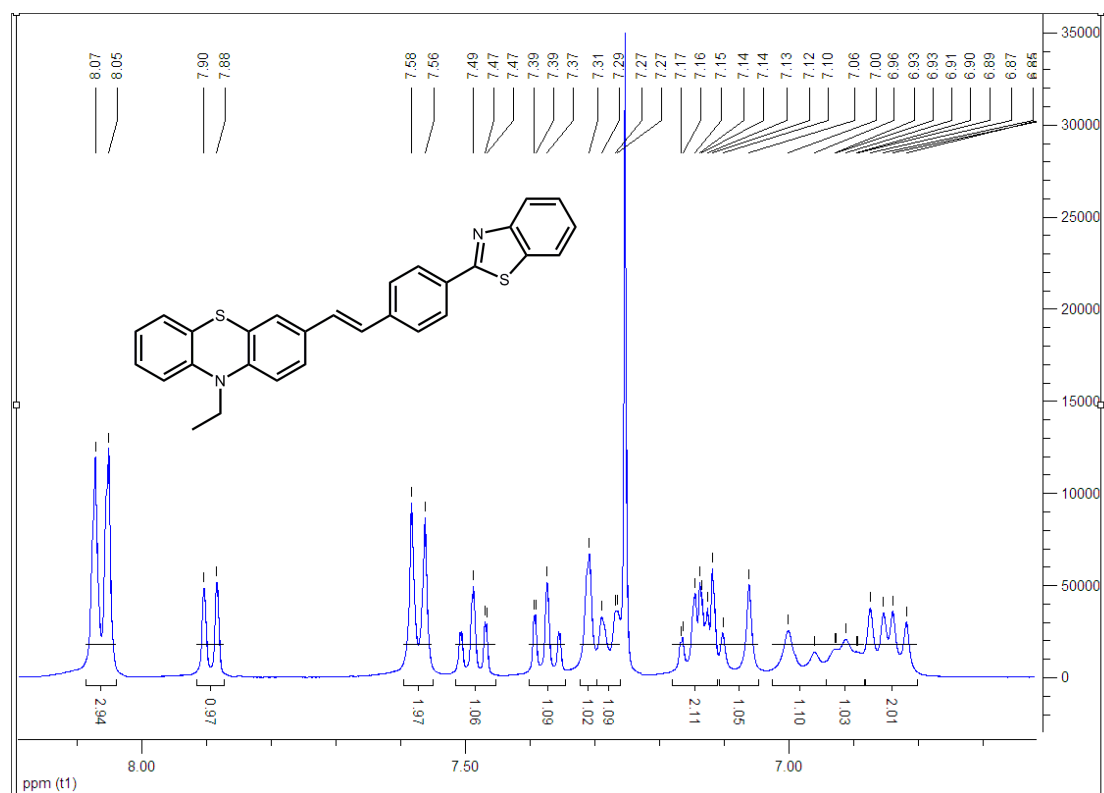

**Fig. S1**  $^1\text{H-NMR}$  (400 MHz,  $\text{CDCl}_3$ ) spectra of compound PVBT.

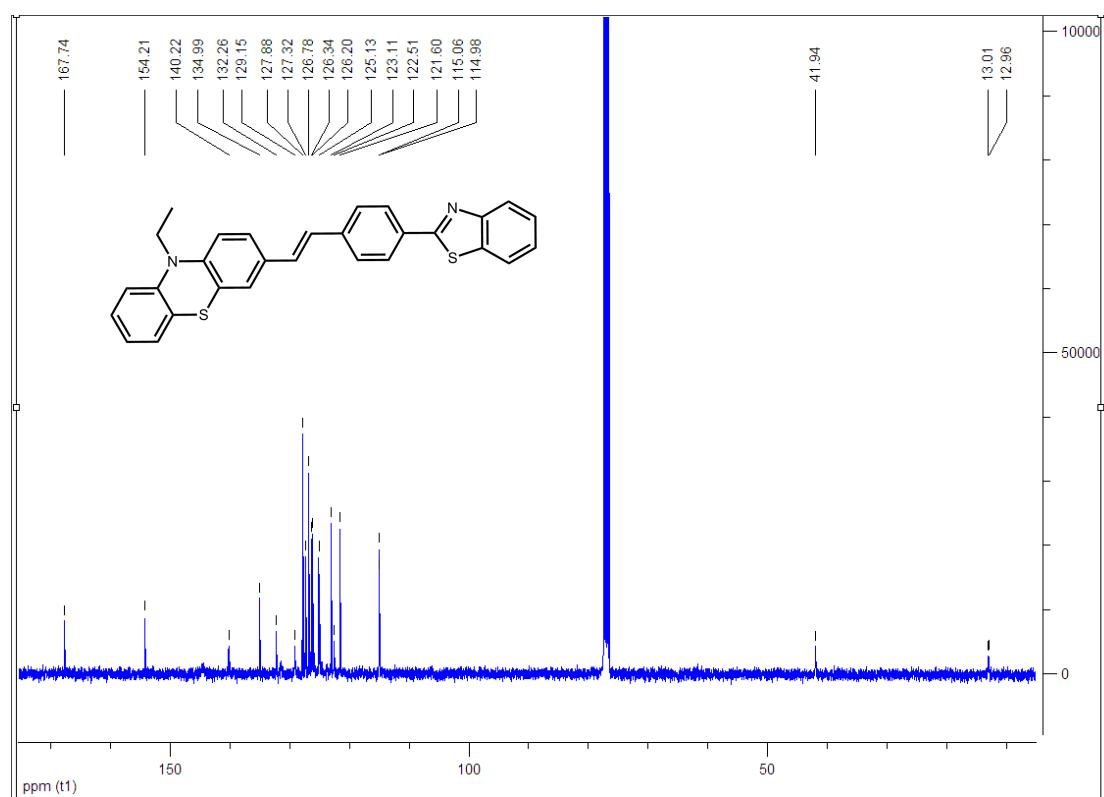

**Fig. S2**  $^{13}\text{C-NMR}$  (100 MHz,  $\text{CDCl}_3$ ) spectrum of compound PVBT.

Reflectron Mode

Data: LR-34-L0001.K14 27 May 2016 17:35 Cal: 28 May 2016 9:44  
Kratos PC Axima CFR V2.3.1: Mode default\_linear, Power: 70, P.Ext. @ 462 (bin 57)  
%Int. 62 mV[sum= 1476 mV] Profiles 1-24 Smooth Av 20 -Baseline 80

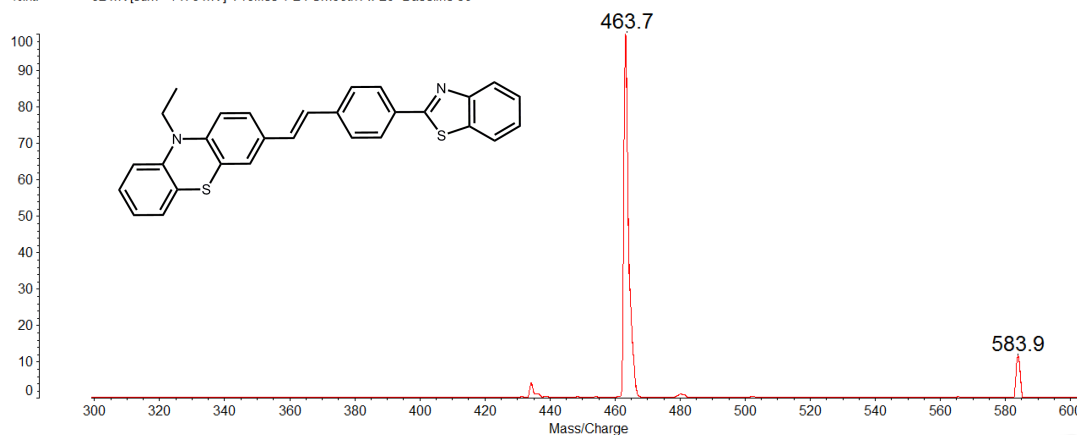

**Fig. S3** The MALDI/TOF MS spectrum of compound **PVBT**.

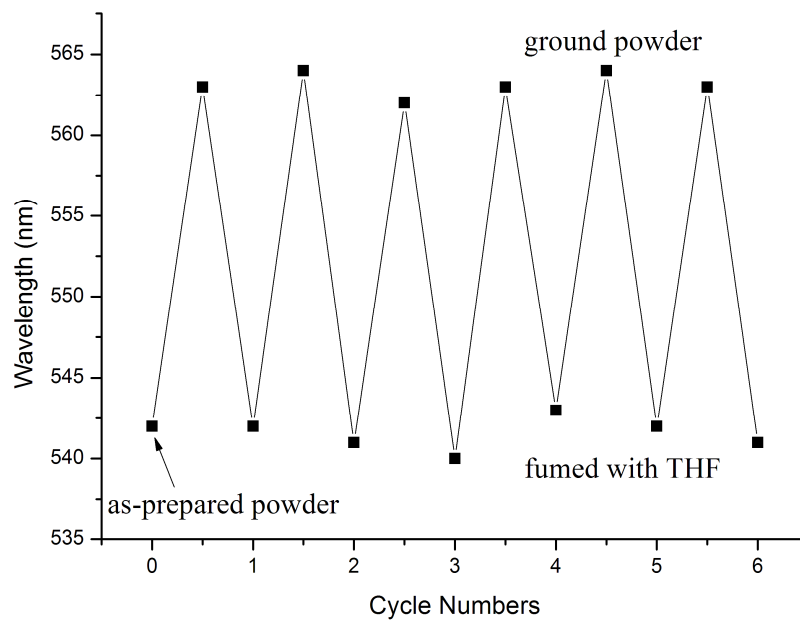

**Fig. S4** Maximum fluorescence emission in different solid states of **PVBT** upon repeating treatment of grinding and fuming with THF vapor.

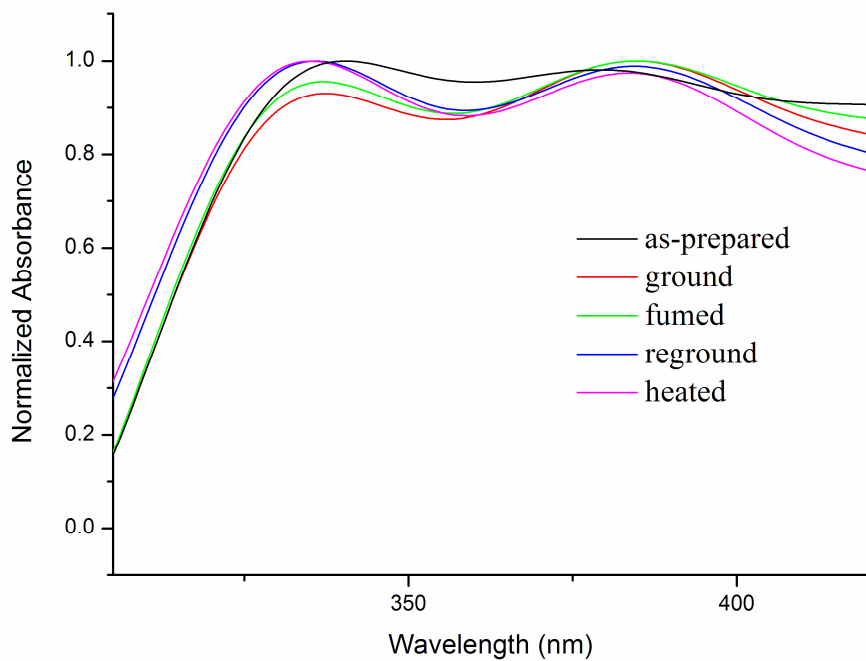

**Fig. S5** Normalized UV-vis absorption spectra of **PVBT** in different solid states.

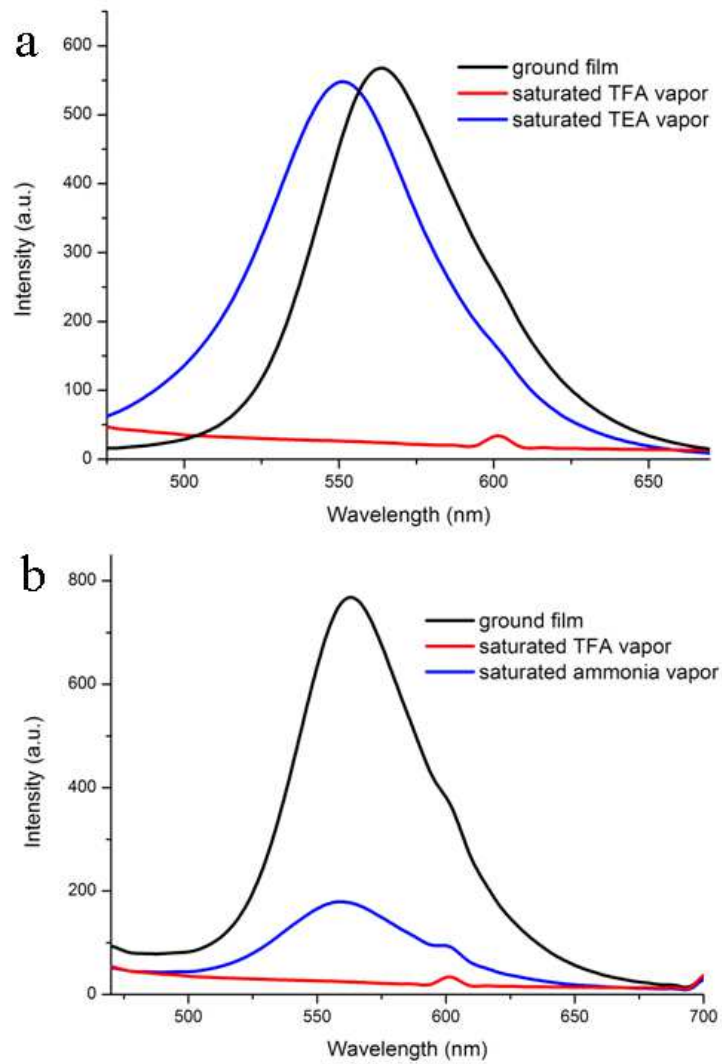

**Fig. S6** (a) Fluorescence spectral change of the ground film of **PVBT** upon exposure to saturated TFA and TEA vapors; (b) Fluorescence spectral change of the ground film of **PVBT** upon exposure to saturated TFA and ammonia vapors.

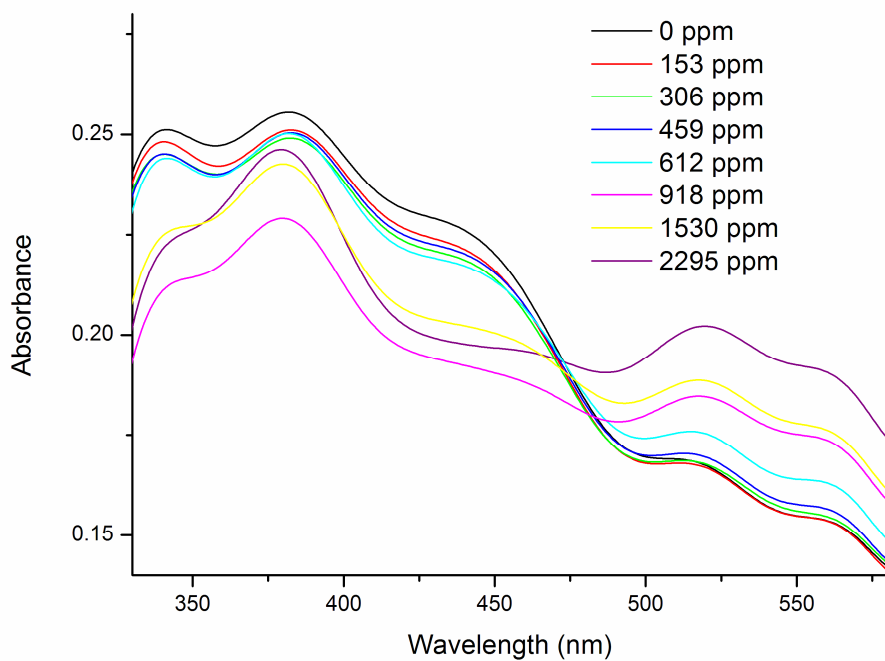

**Fig. S7** Absorption spectra of the ground film of **PVBT** upon exposure to different amounts of TFA vapor.

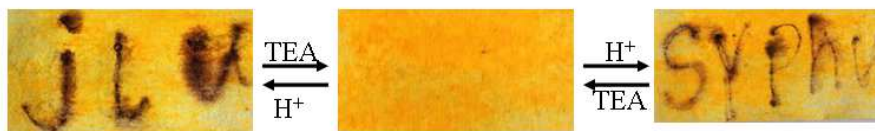

**Fig. S8** Photographs of filter papers coated with the ground film of **PVBT** under different conditions.

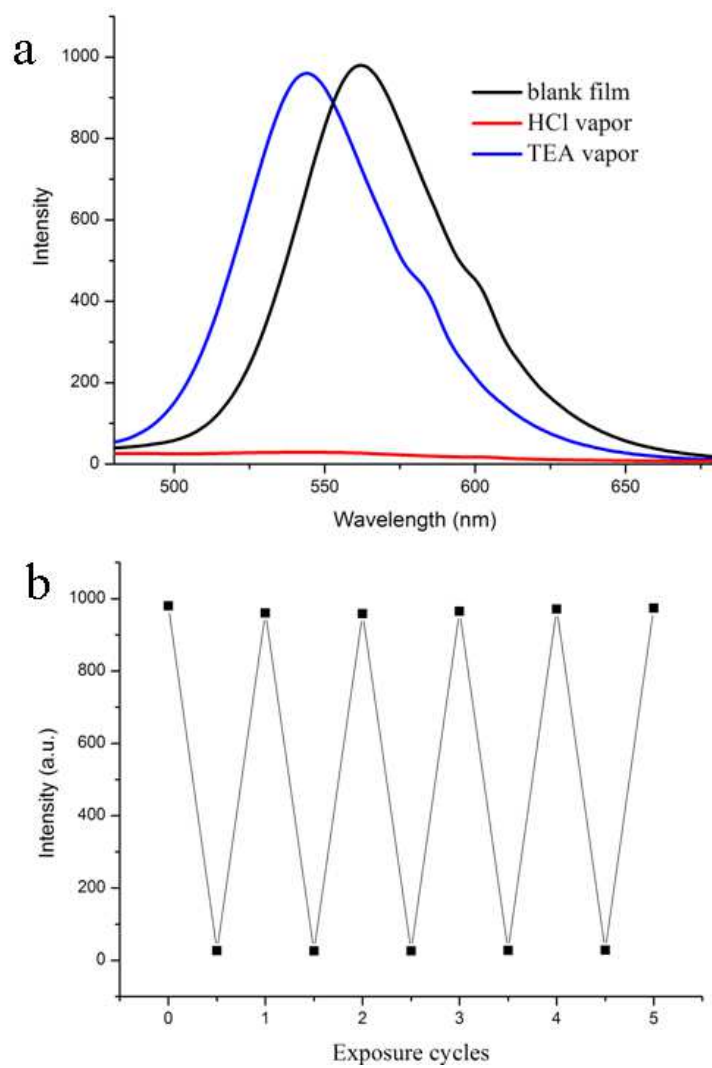

**Fig. S9** (a) Fluorescence spectral change of the ground film of **PVBT** upon exposure to saturated HCl and TEA vapors; (b) Reversible fluorescence emission intensity at 562 nm for **PVBT** solid upon exposure to saturated vapors of HCl and TEA.



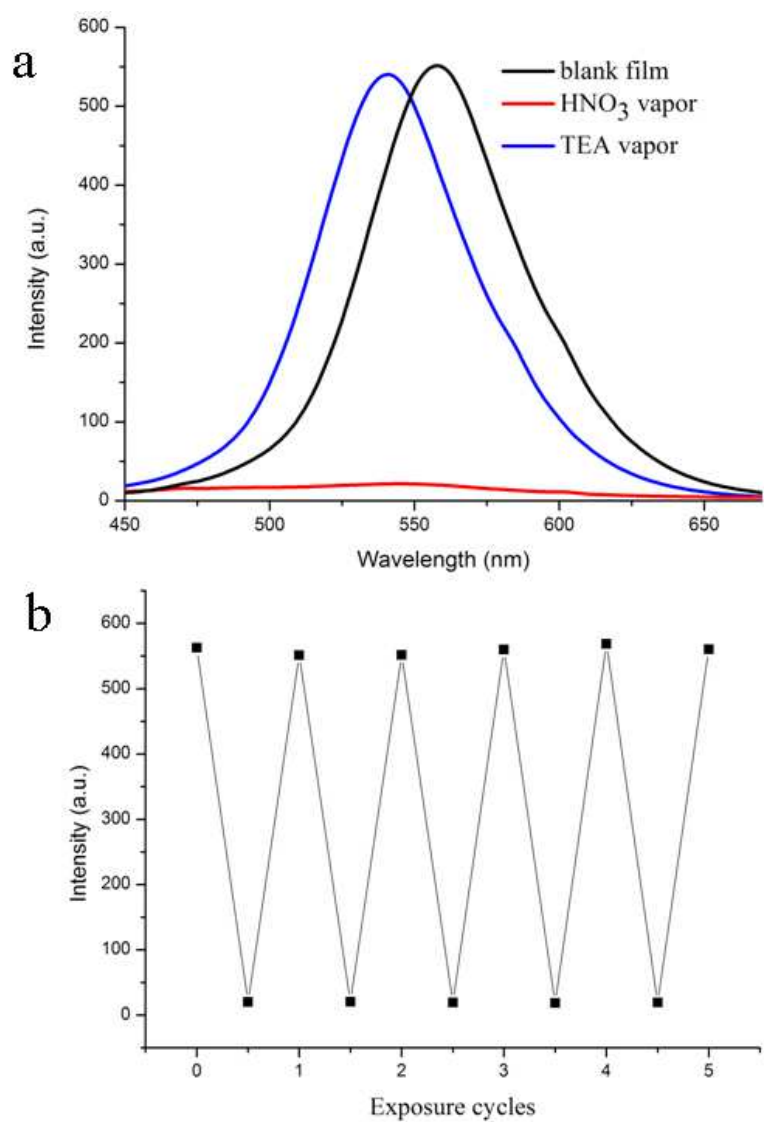

**Fig. S10** (a) Fluorescence spectral change of the ground film of **PVBT** upon exposure to saturated HNO<sub>3</sub> and TEA vapors; (b) Reversible fluorescence emission intensity at 558 nm for **PVBT** solid upon exposure to saturated vapors of HNO<sub>3</sub> and TEA.

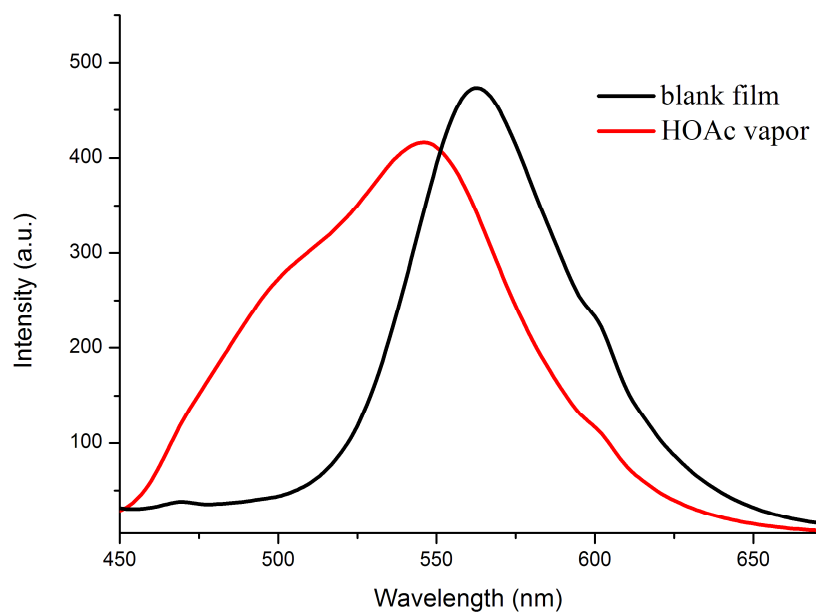

**Fig. S11** Fluorescence spectral change of the ground film of **PVBT** upon exposure to saturated HOAc.
